# Supplementary material
Source: PubMed Central journal article supplement (PMC3985937)
Supplement: ja4130059_si_001.pdf [file ja4130059_si_001.pdf]

**Supporting Information:**

**Enhancing the specificity of recombinase-mediated genome engineering  
through dimer interface redesign**

Thomas Gaj, Shannon J. Sirk, Ryan D. Tingle, Andrew C. Mercer, Mark C. Wallen, and Carlos  
F. Barbas III\*

The Skaggs Institute for Chemical Biology and the Departments of Chemistry and Cell and  
Molecular Biology, The Scripps Research Institute, La Jolla, CA 92037 USA

\*Correspondence to: [carlos@scripps.edu](mailto:carlos@scripps.edu)

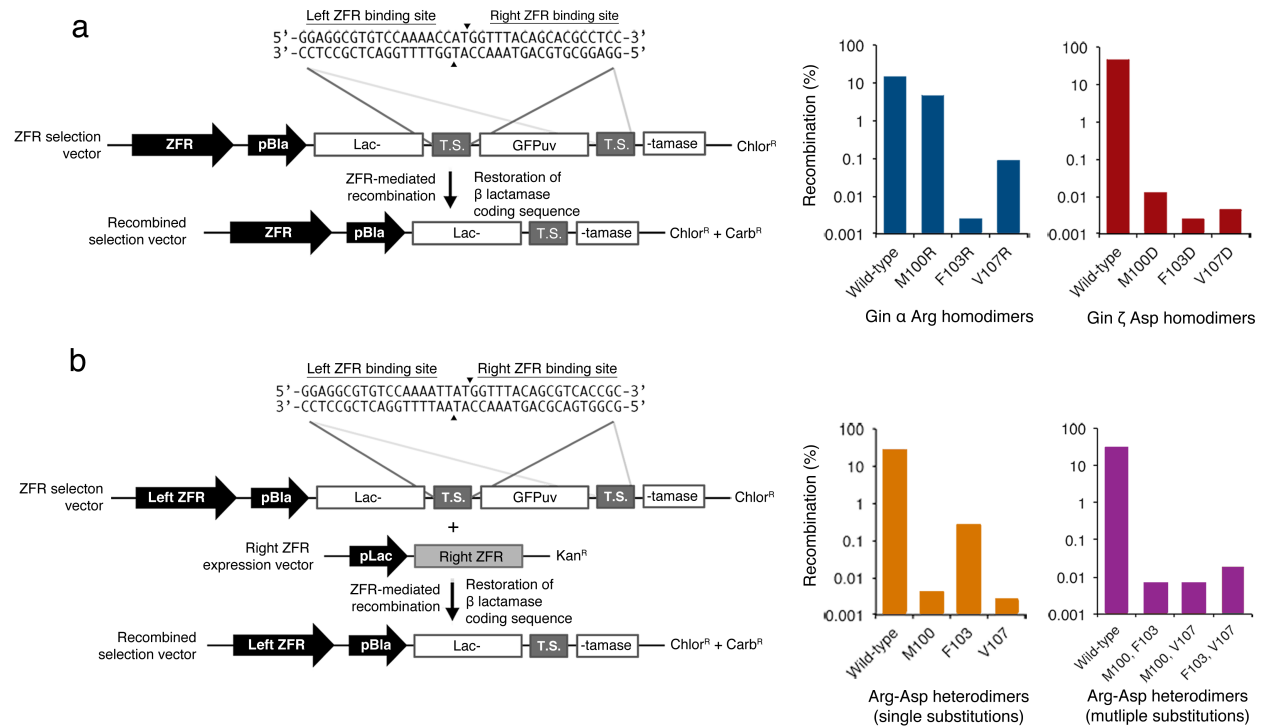

**Figure S1. Impact of charged substitutions within the dimer interface of the Gin recombinase. (a, Left)** Schematic representation of the split gene reporter system used to evaluate homodimer-mediated recombination. Black triangles indicate cleavage site within the DNA target. T.S. indicates target site. **(Right)** Homodimer-mediated recombination by Gin α and ζ catalytic domains containing either Arg (Gin α) or Asp (Gin ζ) substitutions at positions 100, 103 and 107. **(b, Left)** Schematic representation of the split gene reporter system used to evaluate heterodimer-mediated recombination. Assays were performed in cells that harbored a Gin α mutant expression plasmid. **(Right)** Heterodimer-mediated recombination by Gin α and ζ catalytic domains containing single or multiple charge-complementary mutations (i.e. Arg-Asp) at positions 100, 103 and 107.

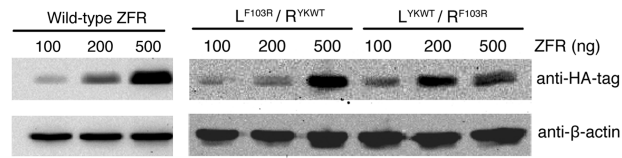

**Figure S2. Expression of wild-type and obligate ZFR heterodimers.** Western blot of lysate from HEK293 cells transfected with increasing amounts of expression vector of standard or obligate ZFR heterodimers. Samples were taken 48 hr after transfection and probed with horseradish peroxidase-conjugated anti-HA and anti-β-actin (loading control) antibodies.

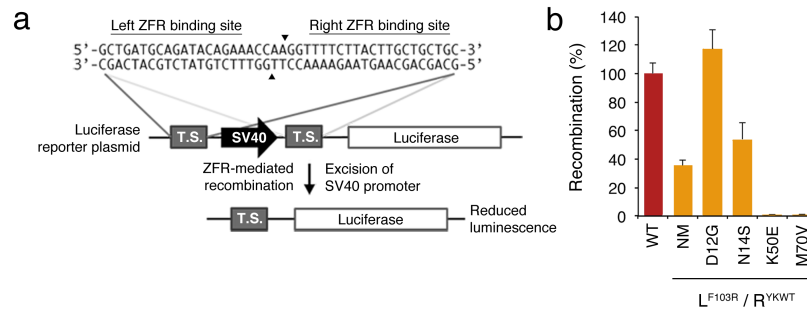

**Figure S3. Recombination by low-activity ZFR heterodimers containing potential hyperactivating mutations. (a)** Schematic representation of the luciferase reporter system used to evaluate ZFR activity. ZFR-mediated recombination leads to excision of the SV40 promoter and reduced luciferase expression in mammalian cells. Black triangles indicate cleavage site within the DNA target. **(b)** Recombination by a ZFR pair designed to target human chromosome 4, composed of the L<sup>F103R</sup> / R<sup>YKWT</sup> dimeric framework and containing one of four substitutions predicted to enhance obligate ZFR heterodimer activity. Recombination normalized to the unmodified wild-type ZFR pair. “NM” indicates the obligate ZFR heterodimeric variant with no additional hyperactivating mutations. *Renilla* luciferase expression was used to normalize for transfection efficiency and cell number. Error bars indicate standard deviation ( $n = 3$ ).

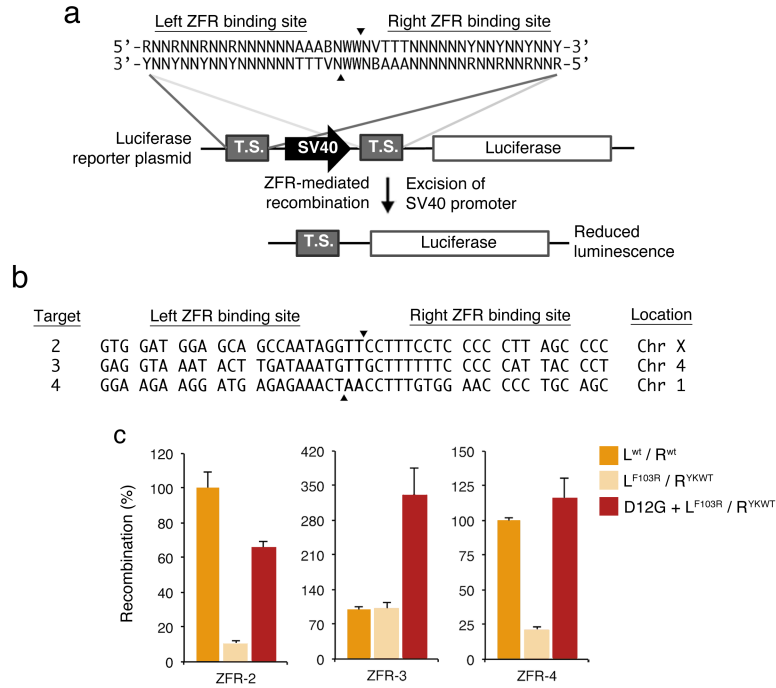

**Figure S4. Portability of the eZFR architecture. (a)** Schematic representation of the luciferase reporter system used to evaluate ZFR activity. Same cartoon as Figure S3A. **(b)** Target sites used to evaluate eZFR activity. **(c)** Recombination efficiency of standard and eZFR pairs 2, 3 and 4, which are designed to target sites from human chromosomes X, 4 and 1, respectively. Recombination efficiency was normalized to the wild-type ZFR pair. *Renilla* luciferase expression was used to normalize for transfection efficiency and cell number. Error bars indicate standard deviation ( $n = 3$ ).

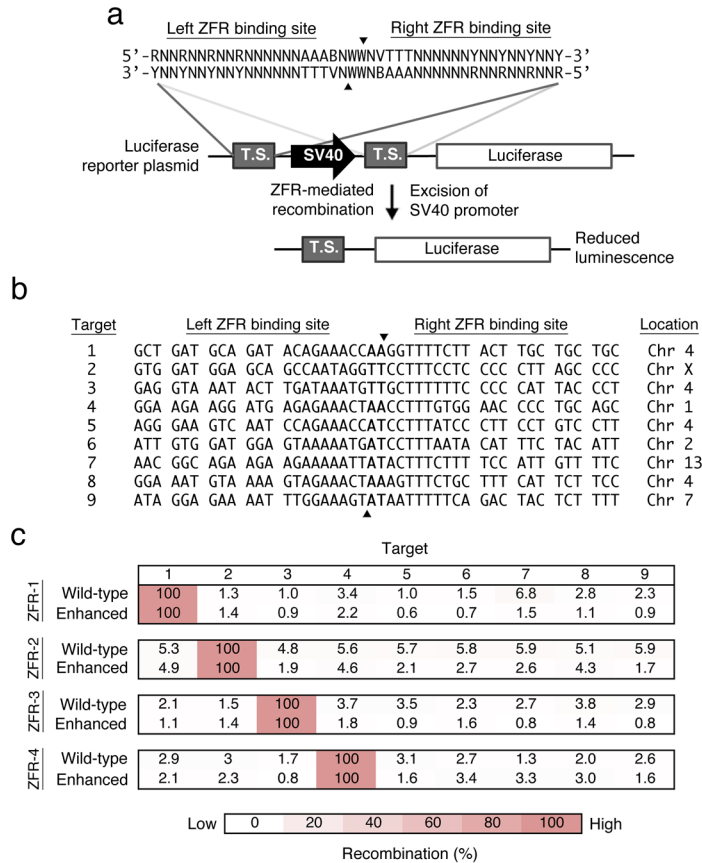

**Figure S5. Recombination specificity of enhanced ZFRs.** (a) Schematic representation of the luciferase reporter system used to evaluate ZFR activity. Same cartoon as Figure S3A. (b) Target sites used to evaluate eZFR specificity. (c) Recombination specificity of standard and eZFR 1, 2, 3 and 4, which are designed to target sites from human chromosomes 4, X, 4 and 1, respectively. Recombination was normalized to the activity of each ZFR pair on its intended DNA target. The eZFRs in this study contained the  $L^{F103R} / R^{YKWT}$  dimeric configuration. *Renilla* luciferase expression was used to normalize for transfection efficiency and cell number.

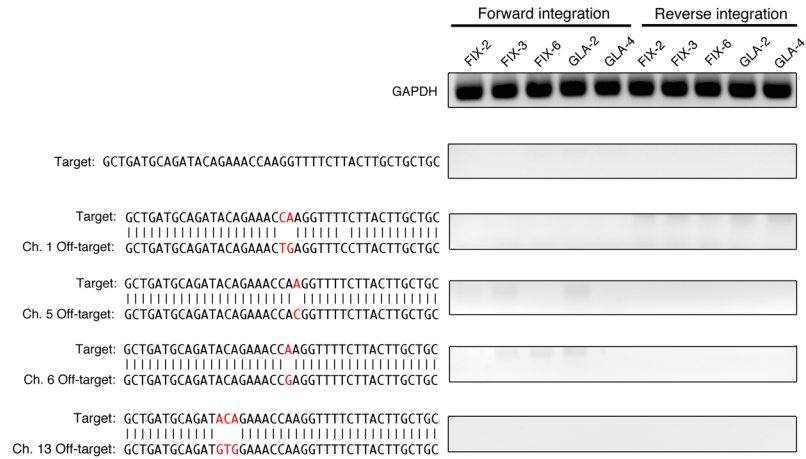

**Figure S6. Analysis of off-target eZFR-mediated integration. (Left)** Potential off-target integration sites identified by BLAST using the human chromosome 4 ZFR target site as reference. Mismatches between the intended and pseudo-target sites are highlighted red. **(Right)** PCR analysis of off-target integration within individual puromycin-resistant HEK293 clones transfected with eZFRs and donor plasmids containing either the human FIX or GLA cDNA. Integration was evaluated in the forward and reverse orientations. GAPDH indicates PCR control. Faint bands are non-specific PCR products.

**>Left ZFR-1 Standard (Target: 1; Location: Ch. 4)**

MLIGYVRVSTNDQNTDLQRNALVCAGCEQIFEDKLSGTRTDRPGLKRALKRLQKGD TLVVKLD  
RLGRSMKHLISLVGELRERGINFRSLTDSIDTSSPMGRFFFYVMGALAEMERELI IERTMAGLA  
AARNKGRIGGRPPKSGTGEKPYKCPECGKSFSTSGNLVRHQ RTHTGEKPYKCPECGKSF S QSGD  
LRRHQ RTHTGEKPYKCPECGKSFSTSGNLVRHQ RTHTGEKPYKCPECGKSF S TSGELVRHQ RTHT  
TGKKTSGQAGQ

**>Left ZFR-1 D12G/F103R (Target: 1; Location: Ch. 4)**

MLIGYVRVSTNGQNTDLQRNALVCAGCEQIFEDKLSGTRTDRPGLKRALKRLQKGD TLVVKLD  
RLGRSMKHLISLVGELRERGINFRSLTDSIDTSSPMGR RFFFYVMGALAEMERELI IERTMAGLA  
AARNKGRIGGRPPKSGTGEKPYKCPECGKSFSTSGNLVRHQ RTHTGEKPYKCPECGKSF S QSGD  
LRRHQ RTHTGEKPYKCPECGKSFSTSGNLVRHQ RTHTGEKPYKCPECGKSF S TSGELVRHQ RTHT  
TGKKTSGQAGQ

**>Left ZFR-1 D12G/YKWT (Target: 1; Location: Ch. 4)**

MLIGYVRVSTNGQNTDLQRNALVCAGCEQIFEDKLSGTRTDRPGLKRALKRLQKGD TLVVKLD  
RLGRSMKHLISLVGELRERGINFRSLTDSIDTSSPYGRFKFY WT GALAEMERELI IERTMAGLA  
AARNKGRIGGRPPKSGTGEKPYKCPECGKSFSTSGNLVRHQ RTHTGEKPYKCPECGKSF S QSGD  
LRRHQ RTHTGEKPYKCPECGKSFSTSGNLVRHQ RTHTGEKPYKCPECGKSF S TSGELVRHQ RTHT  
TGKKTSGQAGQ

**>Right ZFR-1 Standard (Target: 1; Location: Ch. 4)**

MLIGYVRVSTNDQNTDLQRNALVCAGCEQIFEDKLSGTRTDRPGLKRALKRLQKGD TLVVKLD  
RLGRSMKHLISLVGELRERGINFRSLTDSIDTSSPMGRFFFYVMGALAEMERELI IERTMAGLA  
AARNKGRIGGRPPKSGTGEKPYKCPECGKSF SHRTTL TNHQ RTHTGEKPYKCPECGKSF S QSGD  
LRRHQ RTHTGEKPYKCPECGKSF S QSGDLRRHQ RTHTGEKPYKCPECGKSF S QSGDLRRHQ RTHT  
TGKKTSGQAGQ

**>Right ZFR-1 D12G/F103R (Target: 1; Location: Ch. 4)**

MLIGYVRVSTNGQNTDLQRNALVCAGCEQIFEDKLSGTRTDRPGLKRALKRLQKGD TLVVKLD  
RLGRSMKHLISLVGELRERGINFRSLTDSIDTSSPMGR RFFFYVMGALAEMERELI IERTMAGLA  
AARNKGRIGGRPPKSGTGEKPYKCPECGKSF SHRTTL TNHQ RTHTGEKPYKCPECGKSF S QSGD  
LRRHQ RTHTGEKPYKCPECGKSF S QSGDLRRHQ RTHTGEKPYKCPECGKSF S QSGDLRRHQ RTHT  
TGKKTSGQAGQ

**>Right ZFR-1 D12G/YKWT (Target: Location: Ch. 4)**

MLIGYVRVSTNGQNTDLQRNALVCAGCEQIFEDKLSGTRTDRPGLKRALKRLQKGD TLVVKLD  
RLGRSMKHLISLVGELRERGINFRSLTDSIDTSSPYGRFKFY WT GALAEMERELI IERTMAGLA  
AARNKGRIGGRPPKSGTGEKPYKCPECGKSF SHRTTL TNHQ RTHTGEKPYKCPECGKSF S QSGD  
LRRHQ RTHTGEKPYKCPECGKSF S QSGDLRRHQ RTHTGEKPYKCPECGKSF S QSGDLRRHQ RTHT  
TGKKTSGQAGQ



**>Left ZFR-2 Standard (Target: 2; Location: X)**

MLIGYVRVSTNDQNTDLQRNALVCAGCEQIFEDKLSGTRTDRPGLKRALKRLQKGD TLVVWKL D  
RLGRSMKHLISLVGELRERGINFRSLTDSIDTSSPMGRFFFYVMGALAEMERELI IERTMAGLA  
AARNKGRIGGRPPKSGTGEKPYKCPECGKSFSQSGDLRRHQRTHTGEKPYKCPECGKSFSQRAH  
LERHQRTHTGEKPYKCPECGKSFSTSGNLVRHQRTHTGEKPYKCPECGKSFSRSDELVRHQRTHT  
TGKKTSGQAGQ

**>Left ZFR-2 D12G/F103R (Target: 2; Location: X)**

MLIGYVRVSTNGQNTDLQRNALVCAGCEQIFEDKLSGTRTDRPGLKRALKRLQKGD TLVVWKL D  
RLGRSMKHLISLVGELRERGINFRSLTDSIDTSSPMGRORFFFYVMGALAEMERELI IERTMAGLA  
AARNKGRIGGRPPKSGTGEKPYKCPECGKSFSQSGDLRRHQRTHTGEKPYKCPECGKSFSQRAH  
LERHQRTHTGEKPYKCPECGKSFSTSGNLVRHQRTHTGEKPYKCPECGKSFSRSDELVRHQRTHT  
TGKKTSGQAGQ

**>Left ZFR-2 D12G/YKWT (Target: 2; Location: X)**

MLIGYVRVSTNGQNTDLQRNALVCAGCEQIFEDKLSGTRTDRPGLKRALKRLQKGD TLVVWKL D  
RLGRSMKHLISLVGELRERGINFRSLTDSIDTSSPYGRFKFYWTGALAEMERELI IERTMAGLA  
AARNKGRIGGRPPKSGTGEKPYKCPECGKSFSQSGDLRRHQRTHTGEKPYKCPECGKSFSQRAH  
LERHQRTHTGEKPYKCPECGKSFSTSGNLVRHQRTHTGEKPYKCPECGKSFSRSDELVRHQRTHT  
TGKKTSGQAGQ

**>Right ZFR-2 Standard (Target: 2; Location: X)**

MLIGYVRVSTNDQNTDLQRNALVCAGCEQIFEDKLSGTRTDRPGLKRALKRLQKGD TLVVWKL D  
RLGRSMKHLISLVGELRERGINFRSLTDSIDTSSPMGRFFFYVMGALAEMERELI IERTMAGLA  
AARNKGRIGGRPPKSGTGEKPYKCPECGKSFSRSDKLVRHQRTHTGEKPYKCPECGKSFSRSDN  
LKNHQRTHTGEKPYKCPECGKSFSTSGELVRHQRTHTGEKPYKCPECGKSFSRSDKLVRHQRTHT  
TGKKTSGQAGQ

**>Right ZFR-2 D12G/F103R (Target: 2; Location: X)**

MLIGYVRVSTNGQNTDLQRNALVCAGCEQIFEDKLSGTRTDRPGLKRALKRLQKGD TLVVWKL D  
RLGRSMKHLISLVGELRERGINFRSLTDSIDTSSPMGRORFFFYVMGALAEMERELI IERTMAGLA  
AARNKGRIGGRPPKSGTGEKPYKCPECGKSFSRSDKLVRHQRTHTGEKPYKCPECGKSFSRSDN  
LKNHQRTHTGEKPYKCPECGKSFSTSGELVRHQRTHTGEKPYKCPECGKSFSRSDKLVRHQRTHT  
TGKKTSGQAGQ

**>Right ZFR-2 D12G/YKWT (Target: 2; Location: X)**

MLIGYVRVSTNGQNTDLQRNALVCAGCEQIFEDKLSGTRTDRPGLKRALKRLQKGD TLVVWKL D  
RLGRSMKHLISLVGELRERGINFRSLTDSIDTSSPYGRFKFYWTGALAEMERELI IERTMAGLA  
AARNKGRIGGRPPKSGTGEKPYKCPECGKSFSRSDKLVRHQRTHTGEKPYKCPECGKSFSRSDN  
LKNHQRTHTGEKPYKCPECGKSFSTSGELVRHQRTHTGEKPYKCPECGKSFSRSDKLVRHQRTHT  
TGKKTSGQAGQ

**>Left ZFR-3 Standard (Target: 3; Location: Ch. 4)**

MLIGYVRVSTNDQNTDLQRNALVCAGCEQIFEDKLSGTRTDRPGLKRALKRLQKGD TLVVWKL D  
RLGRSMKHLISLVGELRERGINFRSLTDSIDTSSPMGRFFFYVMGALAEMERELI IERTMAGIA  
AARNKGRRFGGRPPKSGTGEKPYKCPECGKSFS THLDLIRHQRTHTGEKPYKCPECGKSFSSTGN

LTVHQRTHTGEKPYKCPECGKSFSQSSSLVRHQRTHTGEKPYKCPECGKSFSRSDNLVRHQRTHTGKKTSGQAGQ

>Left ZFR-3 D12G/F103R (Target: 3; Location: Ch. 4)

MLIGYVRVSTNGQNTDLQRNALVCAGCEQIFEDKLSGTRTDRPGLKRALKRLQKGD TLV VVKLD  
RLGRSMKHLISLVGELRERGINFRSLTDSIDTSSPMGRFFFYVMGALAEMERELIIERTMAGIA  
AARNKGRFRGRPPKSGTGEKPYKCPECGKSFS~~THLDL~~IRHQRTHTGEKPYKCPECGKSFS~~TTGN~~  
LTVHQRTHTGEKPYKCPECGKSFSQSSSLVRHQRTHTGEKPYKCPECGKSFSRSDNLVRHQRTHTGKKTSGQAGQ

>Left ZFR-3 D12G/YKWT (Target: 3; Location: Ch. 4)

MLIGYVRVSTNGQNTDLQRNALVCAGCEQIFEDKLSGTRTDRPGLKRALKRLQKGD TLV VVKLD  
RLGRSMKHLISLVGELRERGINFRSLTDSIDTSSPYGRFKFYWTGALAEMERELIIERTMAGIA  
AARNKGRFRGRPPKSGTGEKPYKCPECGKSFS~~THLDL~~IRHQRTHTGEKPYKCPECGKSFS~~TTGN~~  
LTVHQRTHTGEKPYKCPECGKSFSQSSSLVRHQRTHTGEKPYKCPECGKSFSRSDNLVRHQRTHTGKKTSGQAGQ

>Right ZFR-3 Standard (Target: 3; Location: Ch. 4)

MLIGYVRVSTNDQNTDLQRNALVCAGCEQIFEDKLSGTRTDRPGLKRALKRLQKGD TLV VVKLD  
RLGRSMKHLISLVGELRERGINFRSLTDSIDTSSPMGRFFFYVMGALAEMERELIIERTMAGIA  
AARNKGRFRGRPPKSGTGEKPYKCPECGKSFS~~RSDKL~~VRHQRTHTGEKPYKCPECGKSFS~~RRDE~~  
LNVHQRTHTGEKPYKCPECGKSFSQSSSLVRHQRTHTGEKPYKCPECGKSFSRSDHLTNHQRTHTGKKTSGQAGQ

>Right ZFR-3 D12G/F103R (Target: 3; Location: Ch. 4)

MLIGYVRVSTNGQNTDLQRNALVCAGCEQIFEDKLSGTRTDRPGLKRALKRLQKGD TLV VVKLD  
RLGRSMKHLISLVGELRERGINFRSLTDSIDTSSPMGRFFFYVMGALAEMERELIIERTMAGIA  
AARNKGRFRGRPPKSGTGEKPYKCPECGKSFS~~RSDKL~~VRHQRTHTGEKPYKCPECGKSFS~~RRDE~~  
LNVHQRTHTGEKPYKCPECGKSFSQSSSLVRHQRTHTGEKPYKCPECGKSFSRSDHLTNHQRTHTGKKTSGQAGQ

>Right ZFR-3 D12G/YKWT (Target: 3; Location: Ch. 4)

MLIGYVRVSTNGQNTDLQRNALVCAGCEQIFEDKLSGTRTDRPGLKRALKRLQKGD TLV VVKLD  
RLGRSMKHLISLVGELRERGINFRSLTDSIDTSSPYGRFKFYWTGALAEMERELIIERTMAGIA  
AARNKGRFRGRPPKSGTGEKPYKCPECGKSFS~~RSDKL~~VRHQRTHTGEKPYKCPECGKSFS~~RRDE~~  
LNVHQRTHTGEKPYKCPECGKSFSQSSSLVRHQRTHTGEKPYKCPECGKSFSRSDHLTNHQRTHTGKKTSGQAGQ

>Left ZFR-4 Standard (Target: 4; Location: Ch. 1)

MLIGYVRVSTNDQNTDLQRNALVCAGCEQIFEDKLSGTRTDRPGLKRALKRLQKGD TLV VVKLD  
RLGRSMKHLISLVGELRERGINFRSLTDSIDTSSPMGRFFFYVMGALAEMERELIIERTVMAGIA  
AARNKGRRWGRPPKSGTGEKPYKCPECGKSFS~~RRDEL~~NVHQRTHTGEKPYKCPECGKSFS~~RS~~DH  
L~~TN~~HQRTHTGEKPYKCPECGKSFS~~Q~~LAHLRAHQRTHTGEKPYKCPECGKSFS~~Q~~RAHLERHQRTHTGKKTSGQAGQ

**>Left ZFR-4 D12G/F103R (Target: 4; Location: Ch. 1)**

MLIGYVRVSTN**Q**NTDLQRNALVCAGCEQIFEDKLSGTRTDRPGLKRALKRLQKGDTLVVKLD  
RLGRSMKHLISLVGELRERGINFRSLTDSIDTSSPMGR**R**FFYVMGALAEMERELI**I**ER**V**MAG**I**A  
AARNKGR**R**WGRPPKSGTGEKPYKCPECGKSFS**R**RDELNVHQRTHHTGEKPYKCPECGKSFS**R**SDH  
**L**TNHQRTHHTGEKPYKCPECGKSFS**Q**LAHLRAHQRTHHTGEKPYKCPECGKSFS**Q**RAHLERHQRTH  
TGKKTSGQAGQ

**>Left ZFR-4 D12G/YKWT (Target: 4; Location: Ch. 1)**

MLIGYVRVSTN**Q**NTDLQRNALVCAGCEQIFEDKLSGTRTDRPGLKRALKRLQKGDTLVVKLD  
RLGRSMKHLISLVGELRERGINFRSLTDSIDTSSPYGRF**K**FY**W**TGALAEMERELI**I**ER**V**MAG**I**A  
AARNKGR**R**WGRPPKSGTGEKPYKCPECGKSFS**R**RDELNVHQRTHHTGEKPYKCPECGKSFS**R**SDH  
**L**TNHQRTHHTGEKPYKCPECGKSFS**Q**LAHLRAHQRTHHTGEKPYKCPECGKSFS**Q**RAHLERHQRTH  
TGKKTSGQAGQ

**>Right ZFR-4 Standard (Target: 4; Location: Ch. 1)**

MLIGYVRVSTND**Q**NTDLQRNALVCAGCEQIFEDKLSGTRTDRPGLKRALKRLQKGDTLVVKLD  
RLGRSMKHLISLVGELRERGINFRSLTDSIDTSSPMGR**R**FFYVMGALAEMERELI**I**ERT**M**AG**L**A  
AARNKGR**I**GGRPPKSGTGEKPYKCPECGKSFS**T**SGSLVRHQRTHHTGEKPYKCPECGKSFS**R**SDK  
**L**VRHQRTHHTGEKPYKCPECGKSFS**Q**SGDLRRHQRTHHTGEKPYKCPECGKSFS**T**SGELVRHQRTH  
TGKKTSGQAGQ

**>Right ZFR-4 D12G/F103R (Target: 4; Location: Ch. 1)**

MLIGYVRVSTN**Q**NTDLQRNALVCAGCEQIFEDKLSGTRTDRPGLKRALKRLQKGDTLVVKLD  
RLGRSMKHLISLVGELRERGINFRSLTDSIDTSSPMGR**R**FFYVMGALAEMERELI**I**ERT**M**AG**L**A  
AARNKGR**I**GGRPPKSGTGEKPYKCPECGKSFS**T**SGSLVRHQRTHHTGEKPYKCPECGKSFS**R**SDK  
**L**VRHQRTHHTGEKPYKCPECGKSFS**Q**SGDLRRHQRTHHTGEKPYKCPECGKSFS**T**SGELVRHQRTH  
TGKKTSGQAGQ

**>Right ZFR-4 D12G/YKWT (Target: 4; Location: Ch. 1)**

MLIGYVRVSTN**Q**NTDLQRNALVCAGCEQIFEDKLSGTRTDRPGLKRALKRLQKGDTLVVKLD  
RLGRSMKHLISLVGELRERGINFRSLTDSIDTSSPYGRF**K**FY**W**TGALAEMERELI**I**ERT**M**AG**L**A  
AARNKGR**I**GGRPPKSGTGEKPYKCPECGKSFS**T**SGSLVRHQRTHHTGEKPYKCPECGKSFS**R**SDK  
**L**VRHQRTHHTGEKPYKCPECGKSFS**Q**SGDLRRHQRTHHTGEKPYKCPECGKSFS**T**SGELVRHQRTH  
TGKKTSGQAGQ

**Table S1. ZFR amino acid sequences.** Selected heterodimer mutations are highlighted orange. The D12G substitution is highlighted blue. Arm region mutations that endow target specificity within the catalytic domain are highlighted red. Specificity-determining  $\alpha$ -helical zinc-finger residues are highlighted green.

**>pDonor (empty)**

AATGGCCATAGTTGCATTAATGAATCGGCCAACGCGCGGGGAGAGGCGGTTTTCGTATTGGGCG  
CTCTTCCGCTTCTCGCTCACTGACTCGCTCGCTCGGTCGTTTCGGCTGCGGCGAGCGGTATCA  
GCTCACTCAAAGGCGGTAATACGGTTATCCACAGAATCAGGGGATAACGCAGGAAAGAACATGT  
GAGCAAAGGCCAGCAAAGGCCAGGAACCGTAAAAAGGCCGCGTTGCTGGCGTTTTTCCATAG  
GCTCCGCCCCCTGACGAGCATCACAAAATCGACGCTCAAGTCAGAGGTGGCGAAACCCGACA  
GGACTATAAAGATAACCAGGCGTTTTCCCCTGGAAGCTCCCTCGTGCCTCTCCTGTTCCGACCC  
TGCCGCTTACCGGATACCTGTCCGCCTTCTCCCTTCGGGAAGCGTGGCGCTTCTCATAGCTC  
ACGCTGTAGGTATCTCAGTTCGGTGTAGGTCGTTTCGCTCCAAGCTGGGCTGTGTGCACGAACCC  
CCCGTTACAGCCGACCGCTGCGCCTTATCCGGTAACTATCGTCTTGAGTCCAACCCGGTAAGAC  
ACGACTTATCGCCACTGGCAGCAGCCACTGGTAACAGGATTAGCAGAGCGAGGTATGTAGGCGG  
TGCTACAGAGTTCTTGAAGTGGTGGCCTAACTACGGCTACACTAGAAGAACAGTATTTGGTATC  
TGCGCTCTGCTGAAGCCAGTTACCTTCGAAAAAGAGTTGGTAGCTCTTGATCCGGCAAACAAA  
CCACCGCTGGTAGCGGTGGTTTTTTTTGTTTGAAGCAGCAGATTACGCGCAGAAAAAAGGATC  
TCAAGAAGATCCTTTGATCTTTTCTACGGGGTCTGACGCTCAGTGGAACGAAAACCTCACGTTAA  
GGGATTTTGGTCATGAGATTATCAAAAAGGATCTTACCTAGATCCTTTTTCGGCCGCAAATCA  
ATCTAAAGTATATATGAGTAACTTGGTCTGACAGTTACCAATGCTTAATCAGTGAGGCACCTA  
TCTCAGCGATCTGTCTATTTTCGTTTCATCCATAGTTGCCTGACTCCCCGTCGTGTAGATAACTAC  
GATACGGGAGGGCTTACCATCTGGCCCCAGTGCTGCAATGATACCGCGAGACCCACGCTCACCG  
GCTCCAGATTTATCAGCAATAAACCAGCCAGCCGGAAGGGCCGAGCGCAGAAGTGGTCCTGCAA  
CTTTATCCGCCTCCATCCAGTCTATTAATTGTTGCCGGGAAGCTAGAGTAAGTAGTTCGCCAGT  
TAATAGTTTTCGCAACGTTGTTGCCATTGCTACAGGCATCGTGGTGTACGCTCGTCTGTTTGGT  
ATGGCTTCATTCAGCTCCGGTTCCTAACGATCAAGGCGAGTTACATGATCCCCCATGTTGTGCA  
AAAAAGCGTTAGTCTCTTTCGGTCTCCGATCGTTGTCAGAAGTAAGTTGGCCGCAGTGTTATC  
ACTCATGGTTATGGCAGCACTGCATAATTCTTACTGTGATGCCATCCGTAAGATGCTTTTTCT  
GTGACTGGTGTGACTCAACCAAGTCATTCTGAGAATAGTGTATGCGGCGACCGAGTTGCTCTT  
GCCCCGCGTCAATACGGGATAATACCGCGCCACATAGCAGAACTTTAAAAGTGCTCATCATTGG  
AAAACGTTCTTTCGGGGCGAAAACCTCTCAAGGATCTTACCGCTGTTGAGATCCAGTTCGATGTAA  
CCCCTCGTGCACCCAACCTGATCTTCAGCATCTTTACTTTTACCAGCGTTTCTGGGTGAGCAA  
AAACAGGAAGGCAAATGCCGAAAAAAGGGAATAAGGGCGACACGGAAATGTTGAATACTCAT  
ACTCTTCTTTTTCAATATTATTGAAGCATTTATCAGGGTTATTGTCTCATGAGCGGATACATA  
TTTGAATGTATTTAGAAAAATAAACAAATAGGGGTTCCGCGCACATTTCCCCGAAAAGTGCCAC  
CTGCAGGGATCCGGTGAGATGCCTTATAAGTGTCCGGAATGTGGTAAGTCTTTCAGCCGCAGCG  
ATGACCTGGTGCGCCACCAGCGTACCCACACGGGTGAAAAACCGTATAAATGCCAGAGTGCGG  
CAAATCTTTTAGTCGCAGCGATGTGCTGGTGCGCCATCAACGCACTCATACTGGCGAGAAGCCA  
TACAAATGTCCAGAATGTGGCAAGTCTTTCAGCCAGAGCGGCGATCTGCGCCGCCACCAACGTA  
CTCACACCGGTAAGAAGACCTAAGGCCAGGCCGGCCGAATTCGCCAGCACAGTGGTCGACCCTG  
TGGAATGTGTGTCAGTTAGGGTGTGGAAAGTCCCAGGCTCCCAGCAGGCAGAAGTATGCAAA  
GCATGCATCTCAATTAGTCAGCAACCAGGTGTGGAAAGTCCCAGGCTCCCAGCAGGCAGAAG  
TATGCAAAGCATGCATCTCAATTAGTCAGCAACCATAGTCCCGCCCCTAACCTCCGCCATCCCG  
CCCCTAACTCCGCCAGTTCGCCCCATTCTCCGCCCATGGCTGACTAATTTTTTTTTATTTATG  
CAGAGGCCGAGGCGCCTCTGCCTCTGAGCTATTCCAGAAGTAGTGAGGAGGCTTTTTTTGGAGG  
CCTAGGCTTTTTGCAAAAAGCTTACCATGACCGAGTACAAGCCCACGGTGCCTCGCCACCCGC  
GACGACGTCCCAGGGCCGTACGCACCCTCGCCGCCGCTTCGCCGACTACCCCGCCACGCGCC  
ACACCGTCGATCCGGACCGCCACATCGAGCGGGTCACCGAGCTGCAAGAACTCTTCTCACGCG  
CGTCGGGCTCGACATCGGCAAGGTGTGGGTTCGCGGACGACGGCGCCGCGGTGGCGGTCTGGACC

ACGCCGGAGAGCGTCTGAAGCGGGGGCGGTGTTCCGCCGAGATCGGCCCGCGCATGGCCGAGTTGA  
GCGGTTCCCGGCTGGCCGCGCAGCAACAGATGGAAGGCCTCTGGCGCCGACCGGCCCAAGGA  
GCCCGCGTGGTTCCTGGCCACCGTTCGGCGTCTCGCCCGACCACAGGGCAAGGGTCTGGGCAGC  
GCCGTCTGTCTCCCGGAGTGGAGGCGGCCGAGCGCGCCGGGGTGCCCGCCTTCTGGAGACCT  
CCGCGCCCCGCAACCTCCCCTTCTACGAGCGGCTCGGCTTACCCTCACCGCCGACGTCGAGGT  
GCCCCAAGGACCGCGCACCTGGTGCATGACCCGCAAGCCCGGTGCCTGACGCCCGCCCCACGAC  
CCGAGCGCCCGACCGAAAGGAGCGCACGACCCCATGCATCGATAAAAATAAAAGATTTTATTTA  
GTCTCCAGAAAAAGGGGGGAATGAAAGACCCACCTGTAGGTTTGGCAAGCTAGCTTAAGTAAC  
GCCATTTTGAAGGCATGGAAAAATACATAACTGAGAATAGAGAAGTTCAGATCAAGGTCAGGA  
ACAGATGGAACAGCTGAATATGGGCCAAACAGGATATCTGTGGTAAGCAGTTCCTGCCCGGCT  
CACGGCCAAGAACAGATGGAACAGCTGAATATGGGCCAAACAGGATATCTGTGGTAAGCAGTTC  
CTGCCCGGCTCAGGGCCAAGAACAGATGGTCCCAGATGCGGTCCAGCCCTCAGCAGTTTCTA  
GAGAACCATCAGATGTTTCCAGGGTGCSCCAAGGACCTGAAATGACCCTGTGCCTTATTTGAAC  
TAACCAATCAGTTCGCTTCTCGCTTCTGTTTCGCGCGCTTCTGCTCCCCGAGCTCAATAAAAGAG  
CCCACAACCCCTCACTCGGGGCGCCAGTCTCCGATTGACTGAGTCGCCCGGGTACCCGTGTAT  
CCAATAAACCCCTCTTGACGTTGCATCCGACTTGTGGTCTCGCTGTTTCTTGGGAGGGTCTCTC  
TGAGTGATTGACTACCCGTACGCGGGGGTCTTTCACATGCAGCATGTATCAAATTAATTTGGT  
TTTTTTTCTTAAGTATTTACATTA

**>pDonor-FIX-ZFR**

AATGGCCATAGTTGCATTAATGAATCGGCCAACGCGCGGGGAGAGGCGGTTTTGCGTATTGGGCG  
CTCTTCCGCTTCTCGCTCACTGACTCGCTGCGCTCGGTCTGTTCCGGCTGCGGCGAGCGGTATCA  
GCTCACTCAAAGGCGGTAATACGTTATCCACAGAATCAGGGGATAACGCAGGAAAGAACATGT  
GAGCAAAAGGCCAGCAAAAGGCCAGGAACCGTAAAAAGGCCGCGTTGCTGGCGTTTTTCCATAG  
GCTCCGCCCCCTGACGAGCATCACAAAATCGACGCTCAAGTCAGAGGTGGCGAAACCCGACA  
GGACTATAAAGATAACCAGGCGTTTTCCCCTGGAAGCTCCCTCGTGCCTCTCCTGTTCCGACCC  
TGCCGCTTACCGGATACCTGTCCGCCTTTCTCCCTTCGGGAAGCGTGGCGCTTTCTCATAGCTC  
ACGCTGTAGGTATCTCAGTTCGGTGTAGGTCTGTTCCGCTCCAAGCTGGGCTGTGTGCACGAACCC  
CCCGTTCAGCCCGACCGCTGCGCCTTATCCGGTAACTATCGTCTTGAGTCCAACCCGGTAAGAC  
ACGACTTATCGCCACTGGCAGCAGCCACTGGTAACAGGATTAGCAGAGCGAGGTATGTAGGCGG  
TGCTACAGAGTTCTTGAAGTGGTGGCCTAACTACGGCTACACTAGAAGAACAGTATTTGGTATC  
TGCGCTCTGCTGAAGCCAGTTACCTTCGAAAAAGAGTTGGTAGCTCTTGATCCGGCAAACAAA  
CCACCGCTGGTAGCGGTGGTTTTTTTTGTTTGAAGCAGCAGATTACGCGCAGAAAAAAGGATC  
TCAAGAAGATCCTTTGATCTTTTCTACGGGGTCTGACGCTCAGTGGAACGAAAACCTCACGTTAA  
GGGATTTTGGTCATGAGATTATCAAAAAGGATCTTACCTAGATCCTTTTGCGGCCGCAAATCA  
ATCTAAAGTATATATGAGTAACTTGGTCTGACAGTTACCAATGCTTAATCAGTGAGGCACCTA  
TCTCAGCGATCTGTCTATTTTCGTTTCATCCATAGTTGCCTGACTCCCCGTCTGTAGATAACTAC  
GATACGGGAGGGCTTACCATCTGGCCCCAGTGCTGCAATGATACCGCGAGACCCACGCTCACCG  
GCTCCAGATTTATCAGCAATAAACAGCCAGCCGGAAGGGCCGAGCGCAGAAGTGGTCTGCAA  
CTTTATCCGCCTCCATCCAGTCTATTAATTGTTGCCGGGAAGCTAGAGTAAGTAGTTCGCCAGT  
TAATAGTTTTCGCAACGTTGTTGCCATTGCTACAGGCATCGTGGTGTACGCTCGTCTGTTTGGT  
ATGGCTTCATTCAGCTCCGGTTCCTAACGATCAAGGCGAGTTACATGATCCCCATGTTGTGCA  
AAAAAGCGTTAGCTCCTTCGGTCTCCGATCGTTGTCAGAAGTAAGTTGGCCGAGTGTATC  
ACTCATGGTTATGGCAGCACTGCATAATTCTTACTGTGCATGCCATCCGTAAGATGCTTTTCT  
GTGACTGGTACTCAACCAAGTCATTCTGAGAATAGTGTATGCGGCGACCGAGTTGCTCTT  
GCCCGGCGTCAATACGGGATAATACCGCGCCACATAGCAGAACTTTAAAAGTGCTCATCATTGG

AAAACGTTCTTCGGGGCGAAAACCTCTCAAGGATCTTACCGCTGTTGAGATCCAGTTCGATGTAA  
CCCCTCGTGACCCCAACTGATCTTCAGCATCTTTACTTTCCACCAGCGTTTCTGGGTGAGCAA  
AAACAGGAAGGCAAATGCCGCAAAAAAGGGAATAAGGGCGACACGAAATGTTGAATACTCAT  
ACTCTTCCTTTTTCAATATTATTGAAGCATTATCAGGGTTATTGTCTCATGAGCGGATACATA  
TTTGAATGTATTTAGAAAAATAAACAAATAGGGGTTCCGCGCACATTTCCCCGAAAAGTGCCAC  
CTGCAGGTTGACATTGATTATTGACTAGTTATTAATAGTAATCAATTACGGGGTTCATTAGTTCA  
TAGCCCATATATGGAGTTCGCGTTACATAACTTACGGTAAATGGCCCGCCTGGCTGACCGCCC  
AACGACCCCCGCCATTGACGTCAATAATGACGTATGTTCCCATAGTAACGCCAATAGGGACTT  
TCCATTGACGTCAATGGGTGGAGTATTTACGGTAAACTGCCCACTTGGCAGTACATCAAGTGTA  
TCATATGCCAAGTACGCCCCCTATTGACGTCAATGACGGTAAATGGCCCGCCTGGCATTATGCC  
CAGTACATGACCTTATGGGACTTTCCTACTTGGCAGTACATCTACGTATTAGTCATCGCTATTA  
CCATGGTGATGCGTTTTGGCAGTACATCAATGGGCGTGGATAGCGGTTTTGACTCACGGGGATT  
TCCAAGTCTCCACCCATTGACGTCAATGGGAGTTTGTGGTGGCACCAAATCAACGGGACTTT  
CCAAAATGTCGTAACAACTCCGCCCCATTGACGCAATGGGCGGTAGGCGGTACGGTGGGAGG  
TCTATATAAGCAGAGCTCTCTGGCTAACTAGAGAACCCTGCTTACTGGCTTATCGAAATTAA  
TACGACTCACTATAGGGAGACCCAAGCTGGCTAGTTAAGCTTGATCAAACAAGTTTGTACAAAA  
AAGTTGGCACCATGCAGCGCGTGAACATGATCATGGCAGAATCACCAGGCCTCATCACCATCTG  
CCTTTTAGGATATCTACTCAGTGCTGAATGTACAGTTTTTCTTGATCATGAAAACGCCAACAAA  
ATTCTGAATCGGCCAAAGAGGTATAATTCAGGTAATTTGGAAGAGTTTGTCAAGGGAACCTTG  
AGAGAGAATGTATGGAAGAAAAGTGTAGTTTTGAAGAAGCACGAGAAGTTTTTGAAAACACTGA  
AAGAACAACCTGAATTTTTGGAAGCAGTATGTTGATGGAGATCAGTGTGAGTCCAATCCATGTTTA  
AATGGCGGCAGTTGCAAGGATGACATTAATTCCTATGAATGTTGGTGTCCCTTTGGATTTGAAG  
GAAAGAACTGTGAATTAGATGTAACATGTAACATTAAGAATGGCAGATGCGAGCAGTTTTGTAA  
AAATAGTGCTGATAACAAGGTGGTTTTGCTCCTGTACTGAGGGATATCGACTTGCAGAAAACCAG  
AAGTCTGTGAACCAGCAGTGCCATTTCCATGTGGAAGAGTTTCTGTTTCAAACTTCTAAGC  
TCACCCGTGCTGAGACTGTTTTCTGATGTGGACTATGTAAATTCTACTGAAGCTGAAACCAT  
TTTGGATAACATCACTCAAAGCACCCAATCATTTAATGACTTCACTCGGGTTGTTGGTGGAGAA  
GATGCCAAACCAGGTCAATTCCTTGGCAGGTTGTTTTGAATGGTAAAGTTGATGCATTCTGTG  
GAGGCTCTATCGTTAATGAAAATGGATTGTAACCTGCTGCCCACTGTGTTGAAACTGGTGTAA  
AATTACAGTTGTCGCAGGTGAACATAATATTGAGGAGACAGAACATACAGAGCAAAAGCGAAAT  
GTGATTGCAATTATTCCTCACCACAACATAATGCAGCTATTAATAAGTACAACCATGACATTG  
CCCTTCTGGAACGGACGAACCCTTAGTGCTAAACAGCTACGTTACACCTATTTGCATTGCTGA  
CAAGGAATACACGAACATCTTCCTCAAATTTGGATCTGGCTATGTAAGTGGCTGGGGAAGAGTC  
TTCCACAAAGGGAGATCAGCTTTAGTTCTTCAGTACCTTAGAGTTCCACTTGTTGACCGAGCCA  
CATGTCTTCGATCTACAAAGTTCACCATCTATAACAACATGTTCTGTGCTGGCTTCCATGAAGG  
AGGTAGAGATTCATGTCAAGGAGATAGTGGGGACCCCATGTTACTGAAGTGAAGGGACCAGT  
TTCTTAACTGGAATTATTAGCTGGGGTGAAGAGTGTGCAATGAAAGGCAAATATGGAATATATA  
CCAAGGTATCCCGGTATGTCAACTGGATTAAGGAAAAACAAAGCTCACTTTGCCAACTTTCTT  
GTACTTTCTTGTACAAAGTGGTTCGATCTAGAATGGCTAGCGACTACAAAGACGATGACGACAA  
GTGATCAGCCTCGACTGTGCCTTCTAGTTGCCAGCCATCTGTTGTTTGGCCCTCCCCCGTGCCT  
TCCTTGACCCTGGAAGGTGCCACTCCCACTGTCCTTTCCTAATAAAATGAGGAAATTGCATCGC  
ATTGCTGATGCAGATACAGAAACCAAGTTTTCTACTTGCTGCTGCGGATCCGGTGAGATGCC  
TTATAAGTGTCCGGAATGTGGTAAGTCTTCAGCCGACGCGATGACCTGGTGCGCCACCAGCGT  
ACCCACACGGGTGAAAACCGTATAAATGCCAGAGTGCGGCAAATCTTTTAGTCGCAGCGATG  
TGCTGGTGCGCCATCAACGCACTCATACTGGCGAGAAGCCATACAAATGTCCAGAATGTGGCAA  
GTCTTTCAGCCAGAGCGGCGATCTGCGCCGCCACCAACGTACTCACACCGGTAAGAAGACCTAA

GGCCAGGCCGGCCGAATTCGCCAGCACAGTGGTCGACCCTGTGGAATGTGTGTCAGTTAGGGTG  
TGAAAGTCCCAGGCTCCCAGCAGGCAGAAGTATGCAAAGCATGCATCTCAATTAGTCAGCA  
ACCAGGTGTGAAAGTCCCAGGCTCCCAGCAGGCAGAAGTATGCAAAGCATGCATCTCAATT  
AGTCAGCAACCATAGTCCCGCCCTAACTCCGCCATCCCGCCCTAACTCCGCCAGTTCGCG  
CCATTCTCCGCCCATGGCTGACTAATTTTTTTTATTTATGCAGAGGCCGAGGCCGCCTCTGCC  
TCTGAGCTATTCCAGAAGTAGTGAGGAGGCTTTTTTTGGAGGCCTAGGCTTTTGC AAAAAGCTTA  
CCATGACCGAGTACAAGCCCACGGTGCCTCGCCACCCGCGACGACGTCCCAGGGCCGTACG  
CACCTCGCCGCGCTTCGCCGACTACCCGCCACGCGCCACACCGTCGATCCGGACCGCCAC  
ATCGAGCGGGTCACCGAGCTGCAAGAACTCTTCCTCACGCGCGTCGGGCTCGACATCGGCAAGG  
TGTGGGTCGCGGACGACGGCGCCGCGGTGGCGGTCTGGACCACGCCGGAGAGCGTCAAGCGGG  
GGCGGTGTTCCCGGAGATCGGCCCGCGCATGGCCGAGTTGAGCGGTTCCCGGCTGGCCGCGCAG  
CAACAGATGGAAGGCCTCCTGGCGCCGACCGGCCAAGGAGCCCGCGTGGTTCCTGGCCACCG  
TCGGCGTCTCGCCGACCACCAGGGCAAGGGTCTGGGCAGCGCCGTCTGTGCTCCCAGGAGTGA  
GGCGGCCGAGCGCGCCGGGTGCCCGCTTCTGGAGACCTCCGCGCCCGCAACCTCCCCTTC  
TACGAGCGGCTCGGCTTACCGTCACCGCCGACGTCGAGGTGCCGAAGGACCGCGCACCTGGT  
GCATGACCCGCAAGCCCGGTGCCTGACGCCCGCCACGACCCGACGCGCCCGACCGAAAGGAG  
CGCACGACCCCATGCATCGATAAAATAAAGATTTTATTTAGTCTCCAGAAAAAGGGGGGAATG  
AAAGACCCACCTGTAGGTTTGGCAAGCTAGCTTAAGTAACGCCATTTTGC AAGGCATGGAAAA  
ATACATAACTGAGAATAGAGAAGTTCAGATCAAGGTCAAGAACAGATGGAACAGCTGAATATGG  
GCCAAACAGGATATCTGTGGTAAGCAGTTCCTGCCCGGCTCACGGCCAAGAACAGATGGAACA  
GCTGAATATGGGCCAAACAGGATATCTGTGGTAAGCAGTTCCTGCCCGGCTCAGGGCCAAGAA  
CAGATGGTCCCAGATGCGGTCCAGCCCTCAGCAGTTTCTAGAGAACCATCAGATGTTTCCAGG  
GTGCCCAAGGACCTGAAATGACCCTGTGCCTATTTGAACTAACCAATCAGTTCGCTTCTCGC  
TTCTGTTCCGCGCTTCTGCTCCCGAGCTCAATAAAAGAGCCACAACCCCTCACTCGGGGCG  
CCAGTCTCCGATTGACTGAGTCGCCCGGTACCCGTGTATCCAATAAACCCCTTTGCAGTTGC  
ATCCGACTTGTTGCTCGCTGTTCTTGGGAGGGTCTCCTCTGAGTGATTGACTACCCGTCAGC  
GGGGTCTTTCACATGCAGCATGTATCAAATAAATTTGGTTTTTTTTCTTAAGTATTTACATT  
A

**>pDonor-GLA-ZFR**

AATGGCCATAGTTGCATTAATGAATCGGCCAACGCGCGGGGAGAGGCCGTTTTGCGTATTGGGCG  
CTCTTCCGCTTCTCGCTCACTGACTCGCTGCGCTCGGTCTGTTCCGGTGCAGGCGAGCGGTATCA  
GCTCACTCAAAGGCGGTAATACGTTATCCACAGAATCAGGGGATAACGCAGGAAAGAACATGT  
GAGCAAAAGGCCAGCAAAAGGCCAGGAACCGTAAAAAGGCCGCGTTGCTGGCGTTTTTCCATAG  
GCTCCGCCCCCTGACGAGCATCAAAAAATCGACGCTCAAGTCAGAGGTGGCGAAACCCGACA  
GGACTATAAAGATACCAGGCGTTTTCCCCTGGAAGCTCCCTCGTGCGCTCTCCTGTTCCGACCC  
TGCCGCTTACCGGATACCTGTCCGCCTTTCTCCCTTCGGGAAGCGTGGCGCTTTCTCATAGCTC  
ACGCTGTAGGTATCTCAGTTCGGTGTAGGTCGTTTCGCTCCAAGCTGGGCTGTGTGCACGAACCC  
CCGTTTCAGCCCGACCGCTGCGCCTTATCCGGTAACTATCGTCTTGAGTCCAACCCGGTAAGAC  
ACGACTTATCGCCACTGGCAGCAGCCACTGGTAACAGGATTAGCAGAGCGAGGTATGTAGGCGG  
TGCTACAGAGTTCTTGAAGTGGTGGCCTAACTACGGCTACACTAGAAGAACAGTATTTGGTATC  
TGCGCTCTGCTGAAGCCAGTTACCTTCGAAAAAGAGTTGGTAGCTCTTGATCCGGCAAACAAA  
CCACCGCTGGTAGCGGTGGTTTTTTTTGTTTGAAGCAGCAGATTACGCGCAGAAAAAAGGATC  
TCAAGAAGATCCTTTGATCTTTTCTACGGGGTCTGACGCTCAGTGGAACGAAAACCTCACGTTAA  
GGATTTTGGTCATGAGATTATCAAAAAGGATCTTCACCTAGATCCTTTTTCGCGCCGCAAATCA  
ATCTAAAGTATATATGAGTAAACTTGGTCTGACAGTTACCAATGCTTAATCAGTGAGGCACCTA

TCTCAGCGATCTGTCTATTTTCGTTTCATCCATAGTTGCCTGACTCCCCGTCGTGTAGATAACTAC  
GATACGGGAGGGCTTACCATCTGGCCCCAGTGCTGCAATGATACCGCGAGACCCACGCTCACCG  
GCTCCAGATTTATCAGCAATAAACCCAGCCAGCCGGAAGGGCCGAGCGCAGAAGTGGTCCTGCAA  
CTTTATCCGCCTCCATCCAGTCTATTAATTGTTGCCGGGAAGCTAGAGTAAGTAGTTCGCCAGT  
TAATAGTTTTCGCAACGTTGTTGCCATTGCTACAGGCATCGTGGTGTACGCTCGTCGTTTGGT  
ATGGCTTCATTCAGCTCCGGTTCCCAACGATCAAGGCGAGTTACATGATCCCCATGTTGTGCA  
AAAAAGCGTTAGTCTCCTTCGGTCTCCGATCGTTGTCAGAAGTAAGTTGGCCGCAGTGTTATC  
ACTCATGGTTATGGCAGCACTGCATAATTCTCTTACTGTGATGCCATCCGTAAGATGCTTTTCT  
GTGACTGGTGAGTACTCAACCAAGTCATTCTGAGAATAGTGTATGCGGCGACCGAGTTGCTCTT  
GCCCCGGCTCAATACGGGATAATACCGCGCCACATAGCAGAACTTTAAAAGTGCTCATCATTGG  
AAAACGTTCTTCGGGGCGAAAACCTCAAGGATCTTACCGCTGTTGAGATCCAGTTCGATGTAA  
CCCCTCGTGACCCAACTGATCTTCAGCATCTTTTACTTTTACCAGCGTTTCTGGGTGAGCAA  
AAACAGGAAGGCAAAATGCCGCAAAAAGGGAATAAGGGCGACACGGAAATGTTGAATACTCAT  
ACTCTTCTTTTTCAATATTATTGAAGCATTTATCAGGGTTATTGTCTCATGAGCGGATACATA  
TTTGAATGTATTTAGAAAAATAAACAAATAGGGGTTCCGCGCACATTTCCCCGAAAAGTGCCAC  
CCTGCAGTTGACATTGATTATTGACTAGTTATTAATAGTAATCAATTACGGGGTCATTAGTTC  
ATAGCCCATATATGGAGTTCCGCGTTACATAACTTACGGTAAATGGCCCCCTGGCTGACCGCC  
CAACGACCCCCGCCATTGACGTCAATAATGACGTATGTTCCCATAGTAACGCCAATAGGGACT  
TTCCATTGACGTCAATGGGTGGAGTATTTACGGTAAACTGCCACTTGGCAGTACATCAAGTGT  
ATCATATGCCAAGTACGCCCCCTATTGACGTCAATGACGGTAAATGGCCCCCTGGCATTATGC  
CCAGTACATGACCTTATGGGACTTTCCTACTTGGCAGTACATCTACGTATTAGTCATCGCTATT  
ACCATGGTGATGCGGTTTTGGCAGTACATCAATGGGCGTGGATAGCGGTTTACTCACGGGGAT  
TTCCAAGTCTCCACCCCATGACGTCAATGGGAGTTTGTGTTTGGCACCAAAATCAACGGGACTT  
TCCAAAATGTCGTAACAACCTCCGCCCATGACGCAAAATGGGCGGTAGGCGTGTACGGTGGGAG  
GTCTATATAAGCAGAGCTCTCTGGCTAACTAGAGAACCCTGCTTACTGGCTTATCGAAATTA  
ATACGACTCACTATAGGGAGACCCAAGCTGGCTAGTTAAGCTTGATCAAACAAGTTTGTACAAA  
AAAGCAGGCTCCACCATGCAGCTGAGGAACCCAGAACTACATCTGGGCTGCGCGCTTGCCTTC  
GCTTCTGGCCCTCGTTTCTGGGACATCCCTGGGGCTAGAGCACTGGACAATGGATTGGCAAG  
GACGCCTACCATGGGCTGGCTGCACTGGGAGCGTTCATGTGCAACCTTACTGCCAGGAAGAG  
CCAGATTCCTGCATCAGTGAGAAGCTCTTCATGGAGATGGCAGAGCTCATGGTCTCAGAAGGCT  
GGAAGGATGCAGGTTATGAGTACCTCTGCATTGATGACTGTTGGATGGCTCCCCAAAGAGATTC  
AGAAGGCAGACTTCAGGCAGACCCTCAGCGCTTTCCTCATGGGATTCGCCAGCTAGCTAATTAT  
GTTACAGCAAAGGACTGAAGCTAGGGATTTATGCAGATGTTGGAATAAAACCTGCGCAGGCT  
TCCCTGGGAGTTTTGGATACTACGACATTGATGCCAGACCTTTGCTGACTGGGGAGTAGATCT  
GCTAAAATTTGATGGTTGTTACTGTGACAGTTTGGAAAATTTGGCAGATGGTTATAAGCATG  
TCCTTGGCCCTGAATAGGACTGGCAGAAGCATTGTGTACTCCTGTGAGTGGCCTCTTTATATGT  
GGCCCTTTCAAAAGCCCAATTATACAGAAATCCGACAGTACTGCAATCACTGGCGAAATTTTGC  
TGACATTGATGATTCCTGGAAAAGTATAAAGAGTATCTTGGACTGGACATCTTTTAACCAGGAG  
AGAATTGTTGATGTTGCTGGACCAGGGGTTGGAATGACCCAGATATGTTAGTGATTGGCAACT  
TTGGCCTCAGCTGGAATCAGCAAGTAACTCAGATGGCCCTCTGGGCTATCATGGCTGCTCCTTT  
ATTCATGTCTAATGACCTCCGACACATCAGCCCTCAAGCCAAAGCTCTCCTTCAGGATAAGGAC  
GTAATTGCCATCAATCAGGACCCCTTGGGCAAGCAAGGGTACCAGCTTAGACAGGGAGACAACT  
TTGAAGTGTGGGAACGACCTCTCTCAGGCTTAGCCTGGGCTGTAGCTATGATAAACCGGCAGGA  
GATTGGTGGACCTCGCTCTTATACCATCGCAGTTGCTTCCCTGGGTAAAGGAGTGGCCTGTAAT  
CCTGCCTGCTTCATCACACAGCTCCTCCCTGTGAAAAGGAAGCTAGGGTCTATGAATGGACTT  
CAAGGTTAAGAAGTCACATAAATCCACAGGCACTGTTTTGCTTCAGCTAGAAAATACAATGCA



GATGTCATTA<sup>AAAGACTTACTTTTGGACCCAGC</sup>TTTCTTGTACAAAGTGGTTCGATCTAGAATG  
GCTAGCGACTACAAAGACGATGACGACAAGTGATCAGCCTCGACTGTGCCTTCTAGTTGCCAGC  
CATCTGTTGTTTGGCCCTCCCCGTGCCTTCTTGGACCCTGGAAGGTGCCACTCCACTGTCCT  
TTCCTAATAAAATGAGGAAATTGCATCGCATT<sup>GCTGATGCAGATACAGAAACCAAGGTTTTCTT</sup>  
<sup>ACTTGCTGCTGC</sup>GGATCCGGTGAGATGCCTTATAAGTGTCCGGAATGTGGTAAGTCCTTCAGCC  
GCAGCGATGACCTGGTGCGCCACCAGCGTACCCACACGGGTGAAAAACCGTATAAATGCCCAGA  
GTGCGGCAAATCTTTTAGTCGCAGCGATGTGCTGGTGCCCATCAACGCACTCATACTGGCGAG  
AAGCCATACAAATGTCCAGAATGTGGCAAGTCTTTCAGCCAGAGCGGCGATCTGCGCCGCCACC  
AACGTACTCACACCGGTAAGAAGACCTAAGGCCAGGCCGGCCGAATTCGCCAGCACAGTGGTCG  
ACCCTGTGGAATGTGTGTCAGTTAGGGTGTGGAAAGTCCCCAGGCTCCCCAGCAGGCAGAAGTA  
TGCAAAGCATGCATCTCAATTAGTCAGCAACCAGGTGTGGAAAGTCCCCAGGCTCCCCAGCAGG  
CAGAAGTATGCAAAGCATGCATCTCAATTAGTCAGCAACCATAGTCCCGCCCTAACTCCGCC  
ATCCCCGCCCTAACTCCGCCAGTTCGCCCATTTCTCCGCCCATGGCTGACTAATTTTTTTTTA  
TTTATGCAGAGGCCGAGGCCGCTCTGCCTCTGAGCTATTCCAGAAGTAGTGAGGAGGCTTTTT  
TGGAGGCCTAGGCTTTTTGCAAAAAGCTTACCATGACCGAGTACAAGCCACGGTGCCTCGCC  
ACCCGCGACGACGTCCCCAGGGCCGTACGCACCCTCGCCGCCGCGTTCGCCGACTACCCGCCA  
CGCGCCACACCGTCGATCCGGACCGCCACATCGAGCGGGTCACCGAGCTGCAAGAACTCTTCT  
CACGCGCGTCCGGCTCGACATCGGCAAGGTGTGGGTCCGCGGACGACGGCGCCGCGGTGGCGGTC  
TGGACCACGCCGAGAGCGTGAAGCGGGGGCGGTGTTCGCCGAGATCGGCCCGCGCATGGCCG  
AGTTGAGCGGTTCCCGGCTGGCCGCGCAGCAACAGATGGAAGGCCTCCTGGCGCCGACCCGCC  
CAAGGAGCCCGCGTGGTTCCTGGCCACCGTCCGGCTCTCGCCCGACCACCAGGGCAAGGGTCTG  
GGCAGCGCCGTCGTGCTCCCCGGAGTGGAGGCGGCCGAGCGCGCCGGGGTGCCCGCCTTCTGG  
AGACCTCCGCGCCCCGCAACCTCCCCTTCTACGAGCGGCTCGGCTTACCAGTACCCGCCGACGT  
CGAGGTGCCCGAAGGACCGCGCACCTGGTGCATGACCCGCAAGCCCGGTGCCTGACGCCCGCC  
CACGACCCGCGAGCGCCCGACCGAAAGGAGCGCACGACCCCATGCATCGATAAAATAAAAGATTT  
TATTTAGTCTCCAGAAAAAGGGGGGAATGAAAGACCCACCTGTAGGTTTGGCAAGCTAGCTTA  
AGTAACGCCATTTTGAAGGCATGGAAAAATACATAACTGAGAATAGAGAAGTTCAGATCAAGG  
TCAGGAACAGATGGAACAGCTGAATATGGGCCAAACAGGATATCTGTGGTAAGCAGTTCCTGCC  
CCGGCTCACGGCCAAGAACAGATGGAACAGCTGAATATGGGCCAAACAGGATATCTGTGGTAAG  
CAGTTCCTGCCCGGCTCAGGGCCAAGAACAGATGGTCCCCAGATGCGGTCCAGCCCTCAGCAG  
TTTCTAGAGAACCATCAGATGTTTCCAGGGTGCCCAAGGACCTGAAATGACCCTGTGCCTTAT  
TTGAACTAACCAATCAGTTCGTTCTCGTTCTGTTCGCGCGCTTCTGCTCCCCGAGCTCAATA  
AAAGAGCCCAACCCCTCACTCGGGGCGCCAGTCTCCGATTGACTGAGTCGCCCGGGTACCC  
GTGTATCCAATAAACCCCTTTGCAGTTGCATCCGACTTGTGGTCTCGCTGTTCTTGGGAGGGT  
CTCCTCTGAGTGATTGACTACCCGTCAGCGGGGTCTTTCACATGCAGCATGTATCAAATTA  
TTTGGTTTTTTTTCTTAAGTATTTACATTA

**Table S2. Donor plasmids used in this study.** The PstI and BamHI restriction sites are highlighted red and orange, respectively (empty donor only). The CMV promoter is highlighted green. The human coagulation factor IX and  $\alpha$ -galactosidase genes are highlighted blue and purple, respectively. ZFR target sites are highlighted yellow.

**>GFP-ZFR-ξ-H1-α-P2-XbaI-Fwd**

TTAATTAAGAGTCTAGAGGAGGCGTGTCCAAAATTATGGTTTACAGCGCCACTGCAGATCTAGG  
AGGAATTTAAAATGAG

**>GFP-ZFR-ξ-H1-α-P2-HindIII-Rev**

ACTGACCTAGAGAAGCTTGCAGTGGCGCTGTAAACCATAATTTTGGACACGCCTCCCTGCAGTT  
ATTTGTACAGTTCATC

**>SV40-ZFR-BglIII-Fwd**

TTAATTAAGAGAGATCTGCTGATGCAGATACAGAAACCAAGTTTTCTTACTTGCTGCTGCGCG  
ATCTGCATCTCAATTAGTCAGC

**>SV40-ZFR-HindIII-Rev**

ACTGACCTAGAGAAGCTTGCAGCAGCAAGTAAGAAAACCTTGGTTTCTGTATCTGCATCAGCTT  
TGCAAAGCCTAGGCCTCCAAA

**>PstI-CMV-Donor-Fwd**

CACCACCACCTGCAGTTGACATTGATTATTGACTAGTTATTAAT

**>BamH1-ZFR-Donor**

CACCACCACGGATCCGCAGCAGCAAGTAAGAAAACCTTGGTTTCTGTATCTGCATCAGCAATGC  
GATGCAATTTCTCATTTTATTAGGAAAGGACAGTGGGAGTGGCA

**>Gin-Dimer-Lib-Rev**

CCATTTTCAGCCAGGGCACCMNHMNHGTAGAAMNHMHACGCCCMNHTGGAGATGACGTA

**>Gin-Dimer-Fwd**

GCCCTGGCTGAAATGGAACGAGAACTAATTA

**>Gin-HBS-D12G-Koz**

CACCACCACGCGCGCAAGCTTAGATCTGGCCCAGGCGGCCACCATGCTGATTGGCTATGTAAGG  
GTATCAACAAATGGCCAGAATACAGACC

**>Gin-YKWT-Rev**

ACTGACAGTATTGATACGTCATCTCCATATGGGCGTTTTAAGTTCTACTGGACGGGTGCCCTGG  
CTGAAATGG

**>Gin-F103R-Rev**

GTAGAAGAAACGACGCCCCATTGGAGATGACGT

**>Gin-YKWT-Fwd**

ATACGTCATCTCCATATGGGCGTTTTAAGTTCTACTGGACGGGTGCCCTGGCTGAAATGGAACG  
AGA

**>Gin-F103R-Fwd**

CCAATGGGCGTCGTTTCTTCTACGTTATGGG

**>Gin-AgeI-Rev**  
CACCACCACACCGTTCCCGATTTAGGTGGGCGAC

**>pUC18-Prim-1**  
TGCGGGCCTCTTCGCTATTAC

**>pUC18-Prim-2**  
AATGTGAGTTAGCTCACTCATTAG

**>GAPDH-External-Fwd**  
AACTGCTTAGCACCCCTGGCCAA

**>GAPDH-External-Rev**  
CTTCAAGGGGTCTACATGGCAAC

**>GAPDH-Internal-Fwd**  
GACCACAGTCCATGCCATCAC

**>GAPDH-Internal-Rev**  
TCCACCACCCTGTTGCTGTAG

**>ZFR-1-External-Fwd**  
GGAAGGACTCAGTCATCACAGATGCT

**>ZFR-1-External-Rev**  
GGGTGTGTAATTCCTGCTAGCCCTTGACAG

**>ZFR-1-Internal-Fwd**  
GTTCCCTGCCAGGATCCACTAG

**>ZFR-1-Internal-Rev**  
GCATGTGTCCAGATGCATAGG

**>CMV-External**  
GGTCATTAGTTCATAGCCCATATATGGAGTTC

**>CMV-Internal**  
TGACGTCAATGACGGTAAATGG

**>FIX-Internal**  
TTTCACGAAGGCAAGATTGGCATATCATTG

**>GLA-Internal**  
GCCCTCAAGCCAAAGCTCTCCTTCAGGATA

**>Off-target-Ch-1-External-Fwd**  
TTGACCTAACCTTGGTATTTGTGTGACACA

**>Off-targe-Ch-1-External-Rev**  
CATGGCCTTCATGACTGCTGGCTTCC

**>Off-target-Ch-1-Internal-Fwd**  
AAGCCCTCCGTTAGAATTAATCCCCT

**>Off-target-Ch-1-Internal-Rev**  
TGGAGAAATACCTTGCTCTTAAGTCTT

**>Off-target-Ch-5 External-Fwd**  
TGGGACACCTCGCAGGATCTCG

**>Off-target-Ch-5 External-Rev**  
GTTGCTTATCAGCTTAAGGAGAA

**>Off-target-Ch-5-Internal-Fwd**  
TAGAATTAATCCCCTCTGAAGA

**>Off-target-Ch-5- Internal-Rev**  
AGAAGCACAGAGTACTCAATTTC

**>Off-target-Ch-6-External-Fwd**  
CCTAGTATTTCTTCTGATGCTTTGAA

**>Off-target-Ch-6-External-Rev**  
AACTTGATGGAGATCTTTCTCATGCGC

**>Off-target-Ch-6-Internal-Fwd**  
GAGGAAGGACTCAGTCATCACAGAT

**>Off-target-Ch-6-Internal-Rev**  
TTTCAAATGGAGAAATACCTTGCTCTTA

**>Off-target-Ch-13-External-Fwd**  
TGAGCTCTCCAAGACACCTCACAGGA

**>Off-target-Ch-13-External-Rev**  
ACATCTTGCTGGAGGTCATTGTGTGT

**>Off-target-Ch-13-Internal-Fwd**  
AGGCAAACGCATCTCCAGTCTTGTCAT

**>Off-target-Ch-13-Internal-Rev**  
GGCACAGACTTCTCAATTTTCATTACA

**Table S3. Primers used in this study.** Where applicable, ZFR target sites are underlined.
